# Supplementary material for: Ternary Phenolate-Based Thiosemicarbazone Complexes of Copper(II): Magnetostructural Properties, Spectroscopic Features and Marked Selective Antiproliferative Activity against Cancer Cells
Source: MDPI journal article supplement (doi:10.3390/molecules29020431), 2024-01-16
Supplement: s1 [file s1]

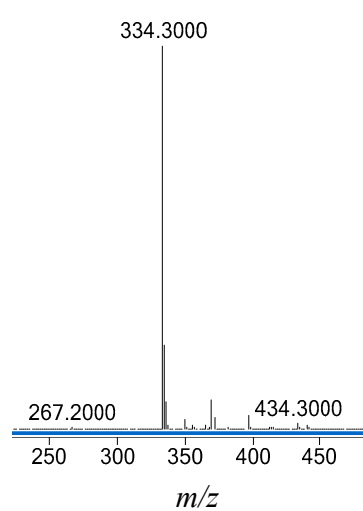

**Figure S1.** ESI mass spectrum of  $\text{H}_2(3,5\text{-}t\text{-Bu}_2)\text{-sal4eT}$  in the negative mode.

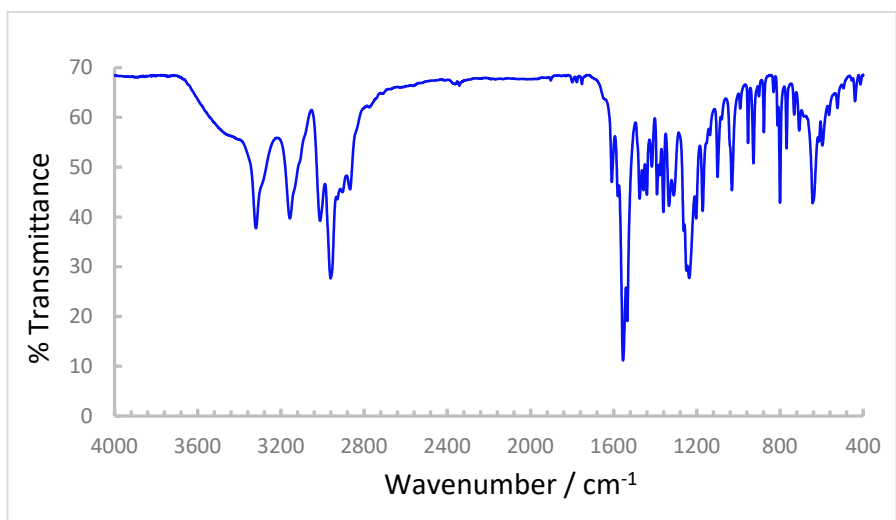

(a)

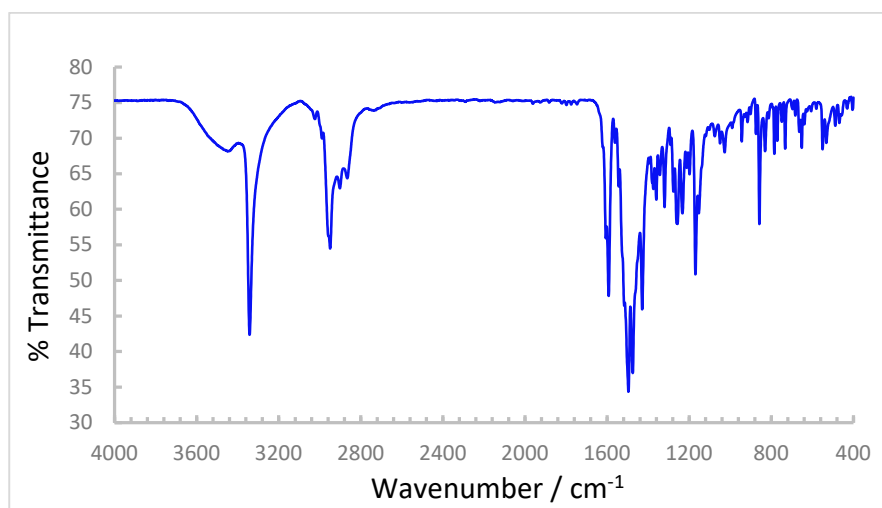

(b)

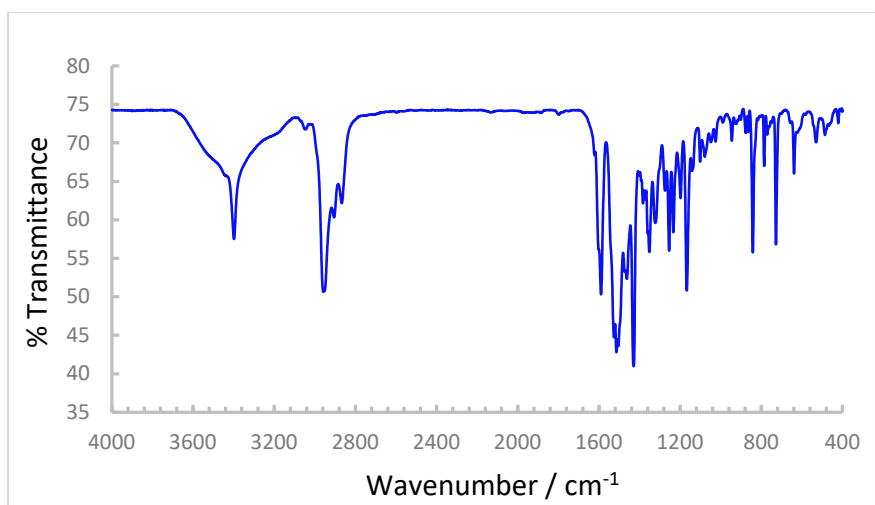

(c)

**Figure S2.** FT-IR spectra of (a)  $\text{H}_2(3,5\text{-}t\text{-Bu}_2)\text{-sal4eT}$ , (b) complex **1** and (c) complex **2**.

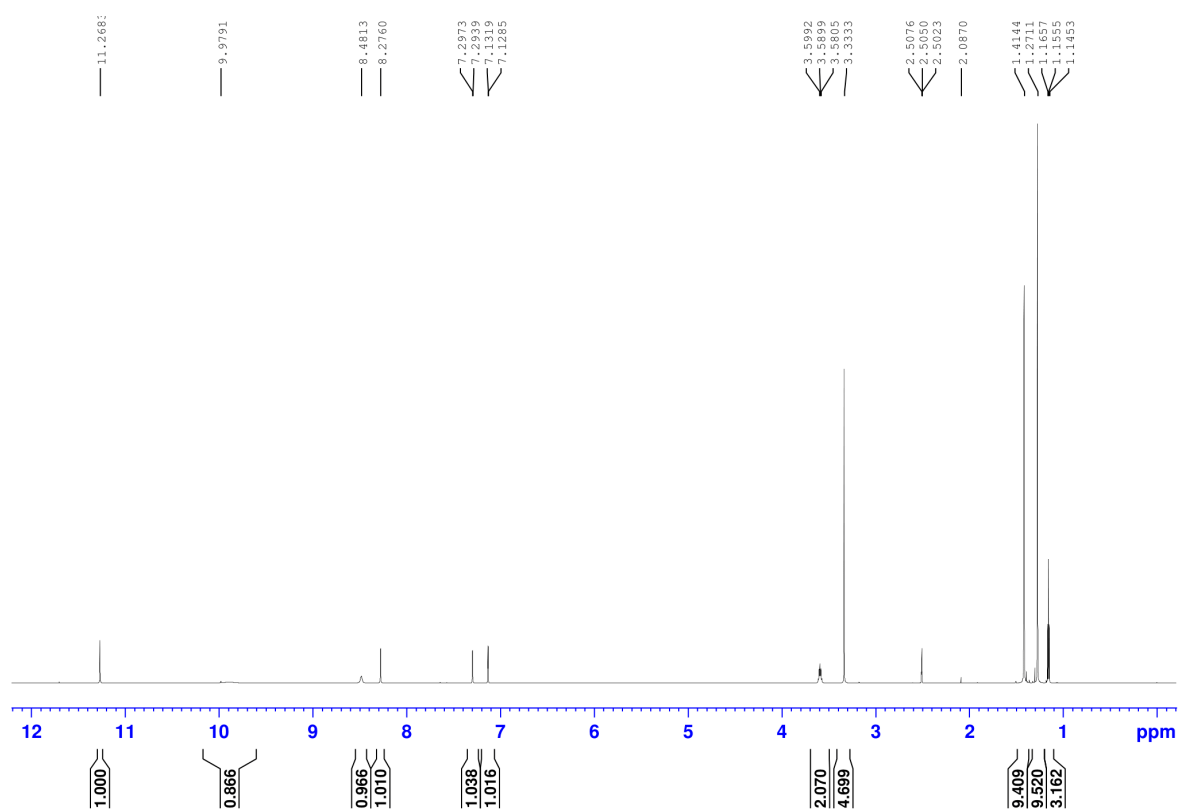

(a)

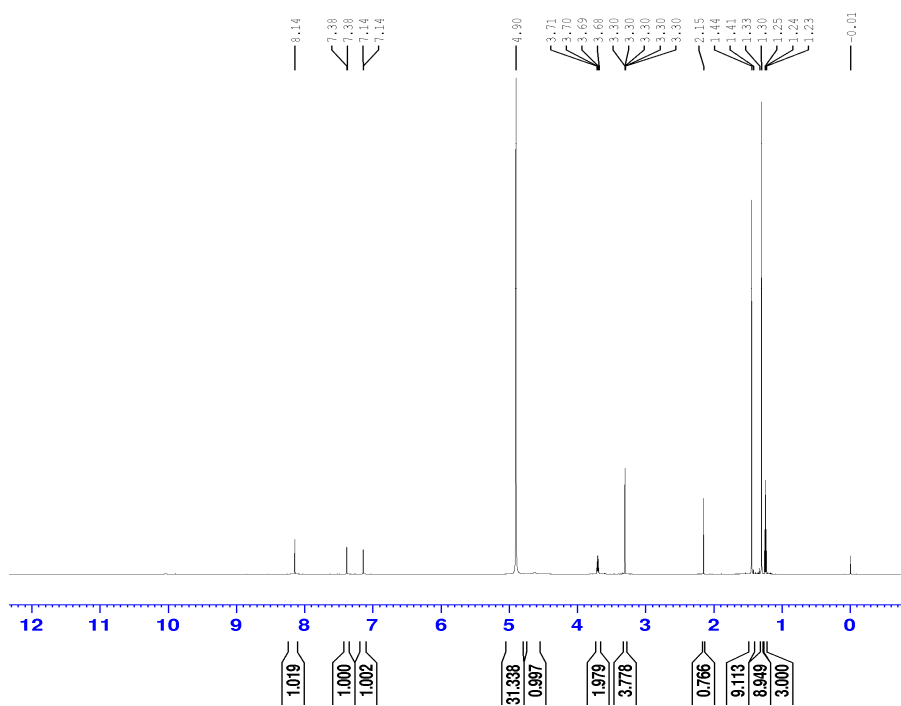

(b)

**Figure S3.**  $^1\text{H}$ -NMR spectra of  $\text{H}_2(3,5\text{-}t\text{-Bu}_2)\text{-sal4eT}$  in (a)  $\text{DMSO-}d_6$  and (b)  $\text{CD}_3\text{OD}$  (700 MHz)

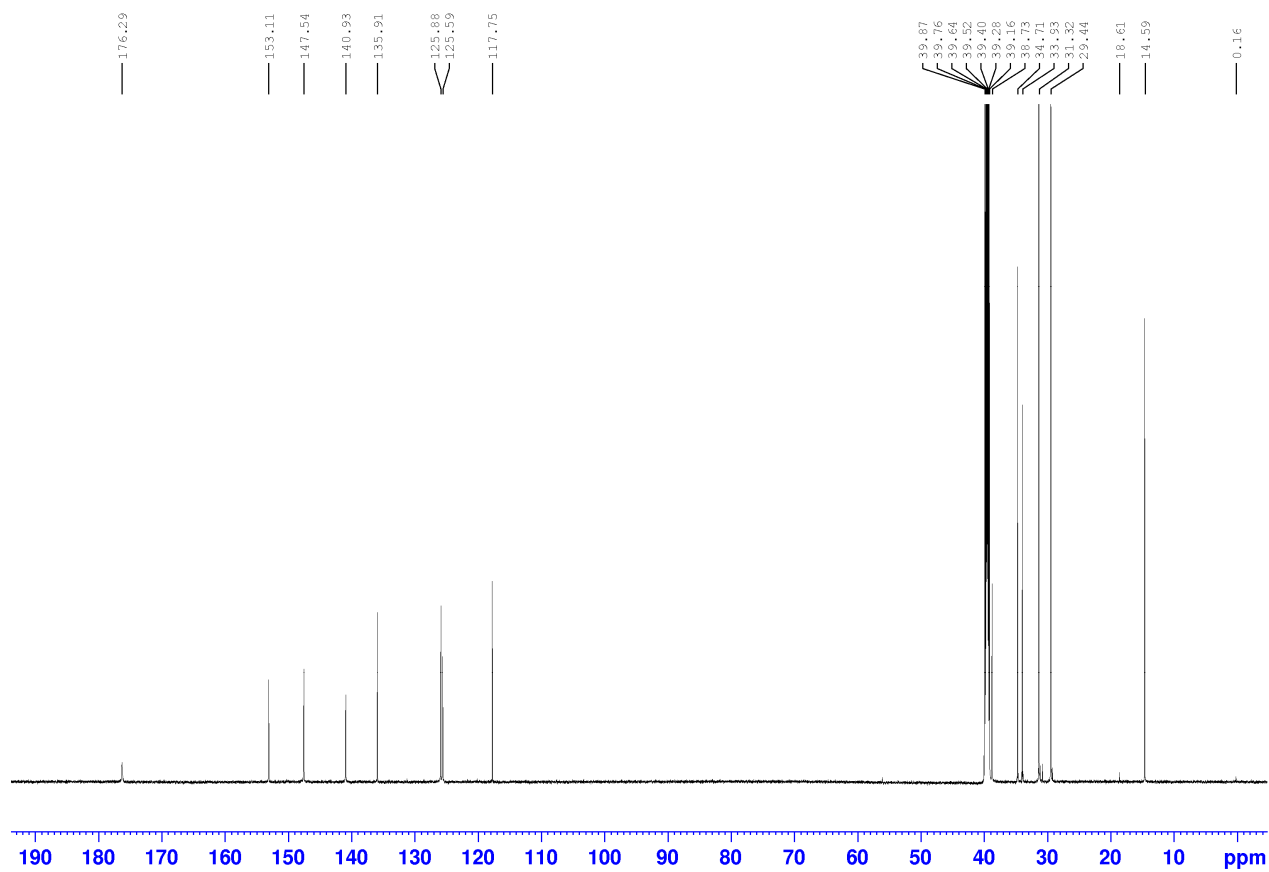

**Figure S4.**  $^{13}\text{C}$ -NMR spectrum of  $\text{H}_2(3,5\text{-}t\text{-Bu}_2)\text{-sal4eT}$  in  $\text{DMSO-}d_6$  (176 MHz)

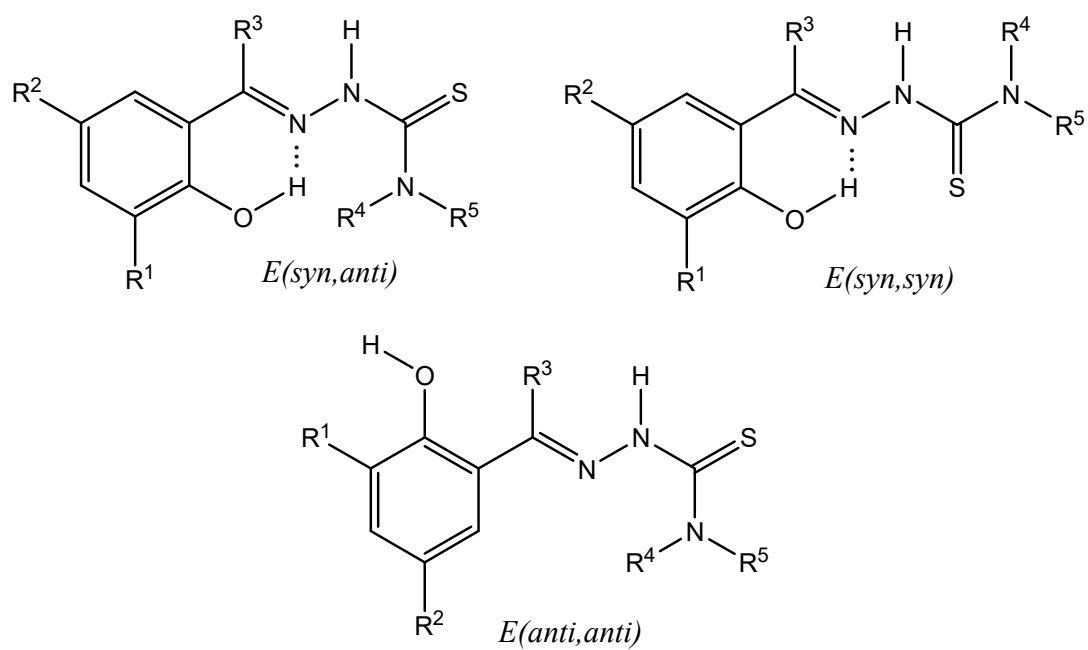

**Figure S5.** Representations of crystallographically observed different orientations of phenolic thiosemicarbazones.

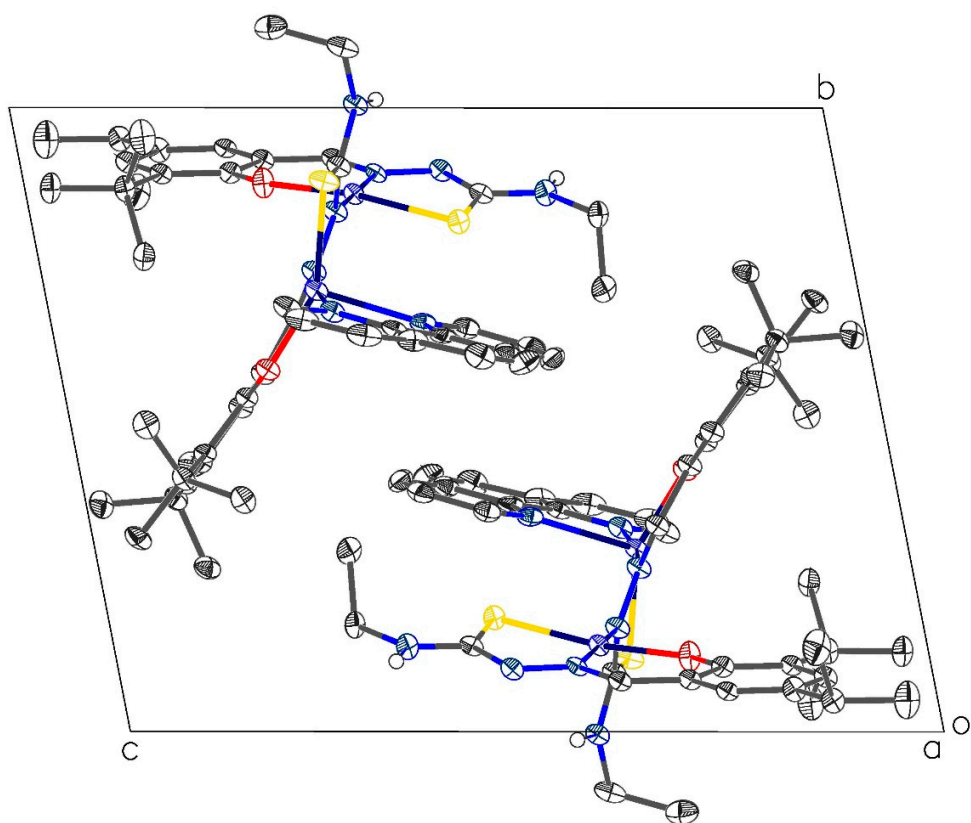

**Figure S6.** Unit cell  $\pi$ - $\pi$  stacking interaction in  $[\text{Cu}_2\{(3,5\text{-}t\text{-Bu}_2)\text{-sal4eT}\}_2(\text{phen})]$  (**2**).
